# Supplementary material for: Role of Co in the Electrocatalytic Activity of Monolayer Ternary NiFeCo-Double Hydroxide Nanosheets for Oxygen Evolution Reaction
Source: MDPI journal article supplement (doi:10.3390/ma14010207), 2021-01-04
Supplement: s1 [file s1]

# Role of Co in the Electrocatalytic Activity of Monolayer Ternary NiFeCo-Double Hydroxide Nanosheets for Oxygen Evolution Reaction

Ye Li <sup>1</sup>, Dan Zhao <sup>2</sup>, Yue Shi <sup>2</sup>, Zhicheng Sun <sup>2</sup> and Ruping Liu <sup>2,\*</sup><sup>1</sup> Beijing Institute of Graphic Communication, School of New Media, Beijing 102600, China; liye@bigc.edu.cn<sup>2</sup> Beijing Institute of Graphic Communication, School of Printing and Packaging Engineering, Beijing 102600, China; zhaodan\_1997@163.com (D.Z.); shiyuematerials@gmail.com (Y.S.); sunzhicheng@bigc.edu.cn (Z.S.)

\* Correspondence: liuruping@bigc.edu.cn; Tel.: +86-010-6026-1603

**Supplementary Materials:** The following are available online at [www.mdpi.com/xxx/s1](http://www.mdpi.com/xxx/s1).

## S1.1. Characterization

The XRD was obtained on a Rigaku UltimaIII. JEOL JEM-2010 was used for collecting HRTEM images. XAFS measurements were obtained from the BL14W1 of Shanghai SSRF. The metal concentrations were measured by inductively coupled plasma (ICP) (ICP-6300, Thermo Fisher Scientific, USA).

## S1.2. Electrochemical measurements

All electrochemical measurements were performed in using a CH Instruments (CHI 660E) work station with three-electrode system (counter electrode: Platinum (Pt) electrode, reference electrode: saturated calomel electrode (SCE)) in 1.0 M KOH aqueous solution. The reversible hydrogen electrode (RHE)  $E_{vs\ RHE} = E_{vs\ SCE} + E_{SCE} + 0.059\text{pH}$ . The working electrode was obtained by loading 100  $\mu\text{L}$  ethanol dispersion solution containing monolayer LDHs (6 mg of catalyst was dispersed in 1 mL of ethanol followed by sonication for  $\sim 30$  min) on  $1\times 1\text{ cm}^2$  carbon-fiber paper with the following dropping 10  $\mu\text{L}$  of a 0.5 wt.% Nafion solution. The scan rate was  $5\text{ mV s}^{-1}$  for LSV. The EIS was conducted over  $1\text{--}10^5\text{ Hz}$ . The Faradic efficiency of the monolayer LDH was defined as the ratio of the evolution amount of  $\text{O}_2$  as a test by TCD to that of the theoretically expected  $\text{O}_2$  from the water oxidation process. The theoretical amount of  $\text{O}_2$  was then calculated by applying the Faraday law (96485.4 C causes 1 equivalent of reaction), and four mol electrons equal to 1 mol  $\text{O}_2$  during OER process.

## S1.3. Computational details

DFT + U calculations were utilized using CASTEP module in Material Studio (The values of  $U - J$  ( $U_{\text{eff}}$ ) was 3.87 eV for Ni, and 4.3 eV for Fe and 3.52 for Co) [1]. The GGA with PBE functional was employed and 340 eV of cutoff was assigned to the plane-wave basis set. The SCF tolerance was  $1\times 10^{-6}$  eV with  $1\times 1\times 1$  k-points for Brillouin zone, and ultrasoft pseudo-potentials for the core electrons.

**Citation:** Li, Y.; Zhao, D.; Shi, Y.; Sun, Z.; Liu, R. Role of Co in the Electrocatalytic Activity of Monolayer Ternary NiFeCo-Double Hydroxide Nanosheets for Oxygen Evolution Reaction. *Materials* **2020**, *14*, x. <https://doi.org/10.3390/xxxxx>

Received: 22 October 2020

Accepted: 14 December 2020

Published:

**Publisher's Note:** MDPI stays neutral with regard to jurisdictional claims in published maps and institutional affiliations.

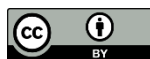

**Copyright:** © 2020 by the authors. Licensee MDPI, Basel, Switzerland. This article is an open access article distributed under the terms and conditions of the Creative Commons Attribution (CC BY) license (<http://creativecommons.org/licenses/by/4.0/>).

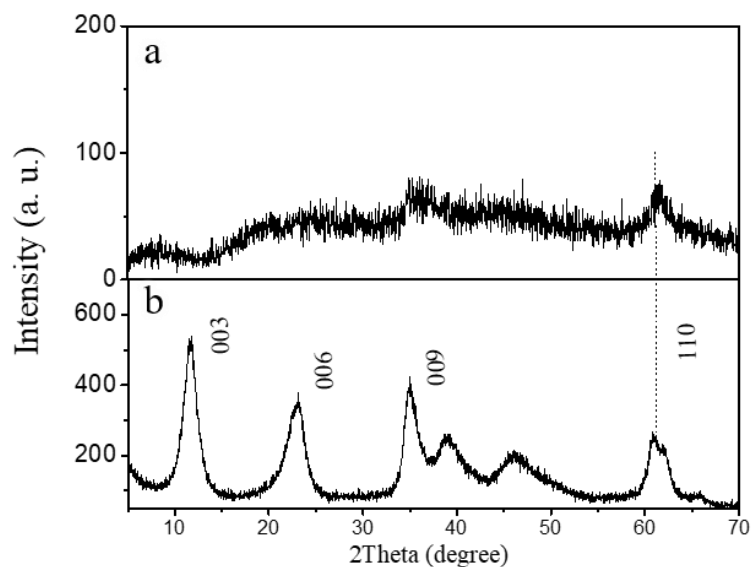

**Figure S1.** XRD patterns of (A) the wet NiFeCo-mono colloid sample, and (B) the NiFeCo-mono after drying at 100 degree, respectively.

The disappeared (*00l*) peaks of NiFeCo-mono colloid sample (Figure S1a) indicated the monolayer LDH nanosheets without stacking along *c*-axis. The (110) peak at ~61° indicated the formation of 2D LDH nanosheets. After drying the colloid NiFeCo-mono samples at 100 degree, the obtained NiFeCo-mono powder showed the appearance of (*00l*) peaks, suggesting the stacking LDH structure.

Based on the ICP results, we can obtain the LDH structure with the ratio of Ni:Fe:Co = 2.00 : 1.00 : 0.40

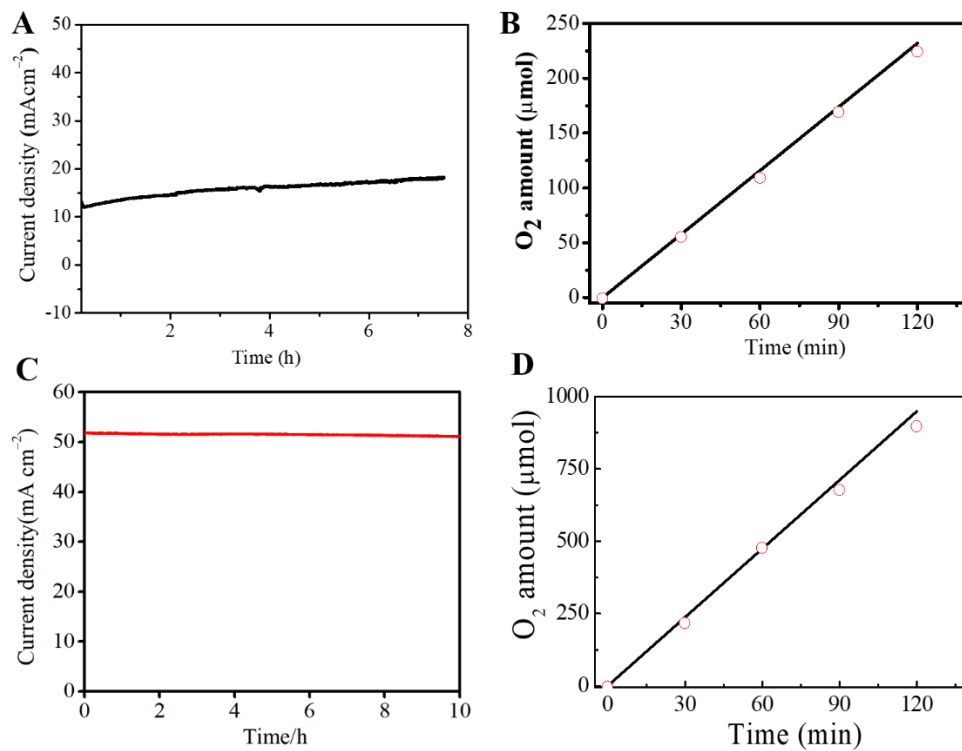

**Figure S2.** I-t curve and the electrocatalytic efficiency of electrode loaded with NiFeCo-mono at (A, B) 1.436 V vs. RHE and at (C, D) 1.540 V vs. RHE, respectively. (The solid line in (B, D) means the theoretically expected O<sub>2</sub>, and the circle responds to the experimentally tested O<sub>2</sub> from GC with TCD detector).

The Faradic efficiency of the monolayer LDH was defined as the ratio of the evolution amount of O<sub>2</sub> as tested using TCD to that of the theoretically expected O<sub>2</sub> from the water oxidation process. The theoretical amount of O<sub>2</sub> was then calculated by applying the Faraday law, 96485.4 C causes 1 equivalent of reaction, and four mol electrons equal to 1 mol O<sub>2</sub> during OER process.

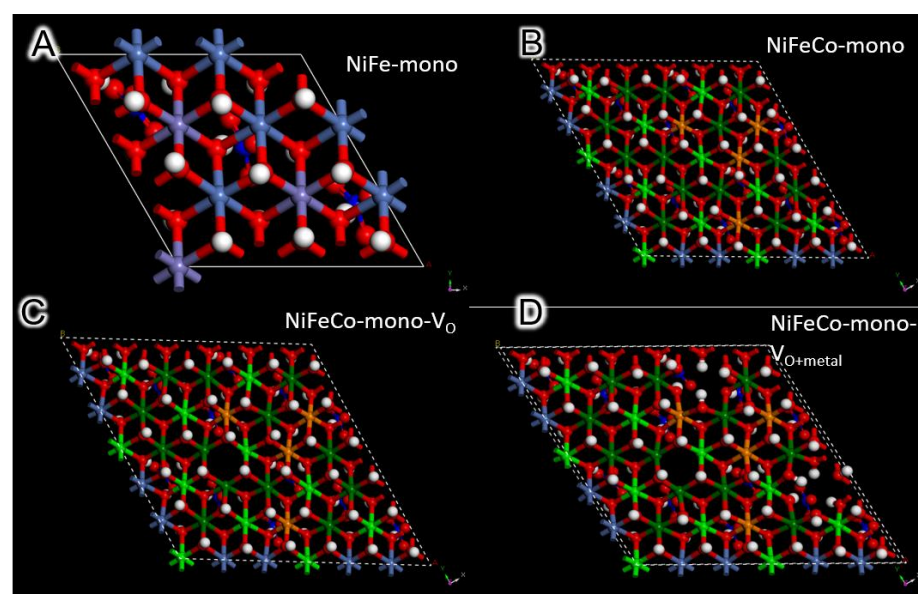

**Figure S3.** The models of (A) NiFe-mono, (B) NiFeCo-mono, (C) NiFeCo-mono-V<sub>o</sub> and (D) NiFeCo-mono-V<sub>o</sub>+metal.

**Table S1.** Fitting results from the EAXFS data of NiFe-mono and NiFeCo-mono.

| Sample      | Shell | $N^a$ | $R[\text{Å}]^b$ | $\sigma^2 [10^{-3} \text{Å}^2]^c$ | $S_0^2$ | R-Factor ( $10^{-2}$ ) |
|-------------|-------|-------|-----------------|-----------------------------------|---------|------------------------|
| NiFe-mono   | Fe-O  | 5.7   | 2.00            | 4.7                               | 1       | 0.74                   |
|             | Fe-M  | 5.3   | 3.10            | 6.6                               |         |                        |
| -           | -     | -     | -               | -                                 | -       | -                      |
| NiFeCo-mono | Fe-O  | 5.4   | 2.00            | 5.9                               | 0.81    | 0.54                   |
|             | Fe-Ni | 4.7   | 3.10            | 8.5                               |         |                        |

<sup>a</sup> $N$  = coordination number; <sup>b</sup> $R$  = distance between absorber and backscatter atoms; <sup>c</sup> $\sigma^2$  = Debye-Waller factor.

## References

1. Xu, S.-M.; Yan, H.; Wei, M., J.; Band structure engineering of transition-metal-based layered double hydroxides toward photocatalytic oxygen evolution from water: a theoretical-experimental combination study. *Phys. Chem. C* **2017**, *121*, 2683-2695. doi: 10.1021/acs.jpcc.6b10159
